# Supplementary material
Source: publisher figshare collection journal article supplement (https://plos.figshare.com/articles/dataset/_/147009)
Supplement: Supplementary file [file 1]

| Locus Tag | Gene Symbol | CT18 Orthologue | Expression Ratio | t     | P.Value | Product String                         | Accession |
|-----------|-------------|-----------------|------------------|-------|---------|----------------------------------------|-----------|
| t0011     | yaaI        | STY0011         | 2.91             | 3.25  | 0.017   | hypothetical protein                   | AL513382  |
| t0030     | NA          | STY0034         | 0.45             | -2.70 | 0.034   | hypothetical protein                   | AL513382  |
| t0065     | citG        | STY0072         | 2.38             | 3.16  | 0.018   | CitG protein                           | AL513382  |
| t0070     | caiE        | STY0079         | 2.57             | 2.93  | 0.025   | carnitine operon protein CaiE          | AL513382  |
| t0083     | NA          | STY0095         | 2.04             | 3.88  | 0.008   | probable secreted protein              | AL513382  |
|           |             |                 |                  |       |         | DL-methionine transporter substrate-   |           |
| t0248     | metQ        | STY0272         | 2.41             | 2.49  | 0.046   | binding subunit                        | AL513382  |
| t0310     | suhB        | STY2792         | 0.31             | -2.72 | 0.033   | inositol monophosphatase               | AL513382  |
| t0364     | NA          | STY2734         | 3.04             | 3.98  | 0.007   | hypothetical protein                   | AL513382  |
| t0375     | NA          | STY2722         | 2.38             | 3.47  | 0.012   | hypothetical protein                   | AL513382  |
|           |             |                 |                  |       |         | putative ethanolamine utilization      |           |
| t0391     | eutQ        | STY2704         | 2.84             | 5.08  | 0.002   | protein EutQ                           | AL513382  |
|           |             |                 |                  |       |         |                                        |           |
| t0408     | amiA        | STY2687         | 0.47             | -2.65 | 0.037   | N-acetylmuramoyl-L-alanine amidase I   | AL513382  |
| t0450     | NA          | STY2648         | 2.56             | 3.01  | 0.023   | hypothetical protein                   | AL513382  |
|           |             |                 |                  |       |         | putative transketolase N-terminal      |           |
| t0523     | NA          | STY2571         | 3.17             | 3.66  | 0.010   | section                                | AL513382  |
| t0569     | NA          | STY2524         | 0.18             | -7.31 | 0.000   | hypothetical protein                   | AL513382  |
| t0575     | NA          | STY2518         | 0.43             | -2.82 | 0.029   | hypothetical protein                   | AL513382  |
|           |             |                 |                  |       |         | DNA-binding response regulator in two- |           |
|           |             |                 |                  |       |         | component regulatory system with       |           |
| t0618     | narP        | STY2472         | 0.37             | -2.66 | 0.036   | NarQ or NarX                           | AL513382  |
| t0620     | NA          | STY2470         | 0.28             | -3.90 | 0.007   | homolog of virulence protein msgA      | AL513382  |
| t0646     | NA          | STY2445         | 0.08             | -4.03 | 0.006   | hypothetical protein                   | AL513382  |
|           |             |                 |                  |       |         | ferric iron-catecholate outer membrane |           |
| t0656     | cirA        | STY2434         | 2.35             | 2.67  | 0.036   | transporter                            | AL513382  |
| t0659     | sdaC        | STY2430         | 0.30             | -3.14 | 0.019   | putative L-serine dehydratase          | AL513382  |
| t0682     | NA          | STY2403         | 0.36             | -2.99 | 0.023   | hypothetical protein                   | AL513382  |
|           |             |                 |                  |       |         | putative permease transmembrane        |           |
| t0692     | yehY        | STY2394         | 3.16             | 4.32  | 0.005   | component                              | AL513382  |
| t0704     | stcA        | STY2381         | 0.25             | -2.53 | 0.043   | putative fimbrial subunit protein      | AL513382  |
| t0707     | stcD        | STY2378         | 0.32             | -3.44 | 0.013   | hypothetical protein                   | AL513382  |
| t0721     | NA          | STY2364         | 2.10             | 2.88  | 0.027   | hypothetical protein                   | AL513382  |
| t0763     | gmd         | STY2321         | 2.28             | 3.38  | 0.014   | GDP-mannose 4,6-dehydratase            | AL513382  |
| t0803     | hisL        | STY2279A        | 0.31             | -3.00 | 0.023   | his operon leader peptide              | AL513382  |

|       |      |          |      |       |       |                                                                       |          |
|-------|------|----------|------|-------|-------|-----------------------------------------------------------------------|----------|
| t0810 | phsB | STY2270  | 2.22 | 2.84  | 0.028 | thiosulfate reductase electron transport protein                      | AL513382 |
| t0811 | phsC | STY2269  | 2.07 | 2.66  | 0.036 | thiosulfate reductase cytochrome b subunit                            | AL513382 |
| t0828 | pduK | STY2251  | 2.73 | 3.21  | 0.017 | putative propanediol utilization protein PduK                         | AL513382 |
| t0837 | pduF | STY2242  | 2.04 | 3.05  | 0.021 | propanediol diffusion facilitator                                     | AL513382 |
| t0883 | ompS | STY2203  | 0.30 | -3.85 | 0.008 | outer membrane protein S1                                             | AL513382 |
| t0890 | NA   | STY2195  | 0.49 | -2.60 | 0.040 | hypothetical protein                                                  | AL513382 |
| t0895 | rcsA | STY2190  | 5.39 | 3.31  | 0.015 | colanic acid capsular biosynthesis activation protein A               | AL513382 |
| t0913 | yedD | STY2172  | 2.43 | 3.44  | 0.013 | hypothetical protein                                                  | AL513382 |
| t0922 | fliY | STY2162  | 3.28 | 4.78  | 0.003 | cystine transporter subunit                                           | AL513382 |
| t0961 | cheY | STY2125  | 2.20 | 2.65  | 0.037 | chemotaxis regulator transmitting signal to flagellar motor component | AL513382 |
| t0965 | flhE | STY2121  | 3.98 | 4.67  | 0.003 | flagellar protein FlhE precursor                                      | AL513382 |
| t0975 | yecD | STY2110  | 0.14 | -3.69 | 0.010 | hypothetical protein                                                  | AL513382 |
| t1011 | NA   | STY2005  | 2.18 | 2.52  | 0.044 | hypothetical protein                                                  | AL513382 |
| t1012 | yjcS | STY2004  | 2.05 | 3.37  | 0.014 | putative hydrolase                                                    | AL513382 |
| t1022 | NA   | STY1988  | 0.08 | -3.98 | 0.007 | hypothetical protein                                                  | AL513382 |
| t1037 | NA   | STY1971  | 3.57 | 2.89  | 0.027 | hypothetical protein                                                  | AL513382 |
| t1042 | ftsI | STY1965  | 0.49 | -2.96 | 0.024 | penicillin-binding protein                                            | AL513382 |
| t1045 | NA   | STY1962  | 0.36 | -2.99 | 0.023 | hypothetical protein                                                  | AL513382 |
| t1050 | NA   | STY1957  | 2.27 | 3.57  | 0.011 | hypothetical protein                                                  | AL513382 |
| t1073 | NA   | STY1933  | 2.03 | 2.53  | 0.043 | hypothetical protein                                                  | AL513382 |
| t1080 | NA   | STY1925  | 2.60 | 2.90  | 0.026 | hypothetical protein                                                  | AL513382 |
| t1094 | NA   | STY1908  | 3.10 | 3.79  | 0.008 | predicted inner membrane protein                                      | AL513382 |
| t1107 | NA   | STY1891  | 0.30 | -2.52 | 0.044 | putative pertussis-like toxin subunit                                 | AL513382 |
| t1116 | pagD | STY1880A | 0.31 | -2.51 | 0.044 | putative outer membrane virulence protein                             | AL513382 |
| t1132 | NA   | STY1867  | 0.07 | -2.62 | 0.038 | putative lipoprotein                                                  | AL513382 |
| t1141 | NA   | STY1858  | 4.82 | 2.88  | 0.027 | hypothetical protein                                                  | AL513382 |
| t1149 | NA   | STY1850  | 3.23 | 3.14  | 0.019 | hypothetical protein                                                  | AL513382 |
| t1190 | osmE | STY1802  | 2.95 | 2.94  | 0.025 | DNA-binding transcriptional activator                                 | AL513382 |
| t1195 | celF | STY1797  | 2.27 | 2.48  | 0.047 | phospho-beta-glucosidase B                                            | AL513382 |
| t1236 | NA   | STY1755  | 0.26 | -2.72 | 0.033 | putative transporter                                                  | AL513382 |

|       |      |         |      |        |       |                                        |          |
|-------|------|---------|------|--------|-------|----------------------------------------|----------|
| t1245 | lppA | STY1745 | 0.22 | -3.57  | 0.011 | major outer membrane lipoprotein       | AL513382 |
| t1254 | ttrS | STY1735 | 2.95 | 2.61   | 0.039 | hypothetical protein                   | AL513382 |
|       |      |         |      |        |       | putative two-component response        |          |
| t1255 | ttrR | STY1733 | 2.51 | 3.06   | 0.021 | regulator                              | AL513382 |
| t1256 | ydhZ | STY1732 | 3.40 | 2.79   | 0.030 | hypothetical protein                   | AL513382 |
|       |      |         |      |        |       | putative two-component response        |          |
| t1259 | ssrB | STY1729 | 0.32 | -2.60  | 0.039 | regulator                              | AL513382 |
| t1260 | ssrA | STY1728 | 0.10 | -5.32  | 0.002 | putative two-component sensor kinase   | AL513382 |
|       |      |         |      |        |       | putative type III secretion system     |          |
| t1267 | sscA | STY1721 | 2.39 | 2.98   | 0.023 | chaperone protein                      | AL513382 |
| t1276 | ssaI | STY1712 | 0.27 | -2.45  | 0.049 | putative pathogenicity island protein  | AL513382 |
|       |      |         |      |        |       |                                        |          |
| t1281 | ssaM | STY1707 | 2.07 | 3.79   | 0.009 | putative pathogenicity island protein  | AL513382 |
| t1341 | NA   | STY1649 | 0.13 | -5.47  | 0.001 | outer membrane protein                 | AL513382 |
| t1360 | NA   | STY1628 | 0.34 | -3.73  | 0.009 | hypothetical protein                   | AL513382 |
| t1364 | NA   | STY1624 | 0.24 | -6.97  | 0.000 | hypothetical protein                   | AL513382 |
|       |      |         |      |        |       | conserved bacteriophage hypothetical   |          |
| t1366 | NA   | STY1622 | 2.82 | 3.56   | 0.011 | protein                                | AL513382 |
|       |      |         |      |        |       | putative bacteriophage transcriptional |          |
| t1397 | NA   | STY1591 | 0.30 | -3.84  | 0.008 | regulator                              | AL513382 |
|       |      |         |      |        |       | putative ABC transporter membrane      |          |
| t1413 | NA   | STY1572 | 2.62 | 2.63   | 0.038 | protein                                | AL513382 |
|       |      |         |      |        |       | putative ABC transporter periplasmic   |          |
| t1414 | NA   | STY1571 | 2.57 | 4.26   | 0.005 | binding protein                        | AL513382 |
| t1430 | NA   | STY1552 | 2.31 | 2.81   | 0.030 | hypothetical protein                   | AL513382 |
| t1451 | NA   | STY1531 | 0.20 | -6.46  | 0.001 | putative ATP/GTP-binding protein       | AL513382 |
| t1458 | hyaA | STY1523 | 0.03 | -14.36 | 0.000 | uptake hydrogenase small subunit       | AL513382 |
| t1459 | NA   | STY1522 | 0.04 | -12.29 | 0.000 | putative secreted hydrolase            | AL513382 |
| t1470 | NA   | STY1507 | 2.82 | 2.76   | 0.032 | putative aminotransferase              | AL513382 |
| t1474 | NA   | STY1502 | 2.90 | 2.78   | 0.031 | putative secreted protein              | AL513382 |
|       |      |         |      |        |       | respiratory nitrate reductase 2 alpha  |          |
| t1488 | narZ | STY1488 | 0.42 | -3.91  | 0.007 | chain                                  | AL513382 |
|       |      |         |      |        |       | respiratory nitrate reductase 2 beta   |          |
| t1489 | narY | STY1487 | 0.38 | -4.26  | 0.005 | chain                                  | AL513382 |
| t1535 | NA   | STY1439 | 0.46 | -2.60  | 0.039 | hypothetical protein                   | AL513382 |

|       |      |         |       |        |       |                                                                       |          |
|-------|------|---------|-------|--------|-------|-----------------------------------------------------------------------|----------|
| t1553 | NA   | STY1419 | 0.36  | -3.52  | 0.012 | probable pyruvate-flavodoxin oxidoreductase                           | AL513382 |
| t1561 | NA   | STY1408 | 2.51  | 5.27   | 0.002 | putative chemo-receptor protein                                       | AL513382 |
| t1562 | NA   | STY1406 | 2.03  | 2.84   | 0.028 | hypothetical protein                                                  | AL513382 |
| t1566 | NA   | STY1402 | 0.47  | -3.04  | 0.022 | hypothetical protein                                                  | AL513382 |
| t1568 | NA   | STY1400 | 2.22  | 3.57   | 0.011 | conserved hypothetical DNA-binding protein                            | AL513382 |
| t1581 | NA   | STY1386 | 2.90  | 3.88   | 0.008 | putative transcriptional regulator                                    | AL513382 |
| t1640 | NA   | STY1323 | 0.25  | -3.24  | 0.017 | hypothetical protein                                                  | AL513382 |
| t1641 | NA   | STY1322 | 0.10  | -11.50 | 0.000 | hypothetical protein                                                  | AL513382 |
| t1642 | NA   | STY1321 | 0.05  | -5.67  | 0.001 | hypothetical protein                                                  | AL513382 |
| t1643 | NA   | STY1320 | 0.23  | -4.33  | 0.005 | hypothetical protein                                                  | AL513382 |
| t1708 | NA   | STY1252 | 2.93  | 4.35   | 0.004 | hypothetical protein                                                  | AL513382 |
| t1749 | flgN | STY1210 | 2.90  | 2.67   | 0.036 | flagella synthesis protein FlgN                                       | AL513382 |
| t1753 | rimJ | STY1205 | 2.10  | 3.54   | 0.011 | ribosomal-protein-S5-alanine N-acetyltransferase                      | AL513382 |
| t1773 | NA   | STY1184 | 2.41  | 2.71   | 0.034 | hypothetical protein                                                  | AL513382 |
| t1788 | NA   | STY1169 | 12.26 | 3.11   | 0.020 | putative sialic acid transporter                                      | AL513382 |
| t1789 | NA   | STY1168 | 21.25 | 3.02   | 0.022 | putative secreted protein                                             | AL513382 |
| t1790 | NA   | STY1167 | 10.37 | 2.77   | 0.031 | hypothetical protein                                                  | AL513382 |
| t1792 | NA   | STY1165 | 10.03 | 2.47   | 0.047 | putative membrane transporter                                         | AL513382 |
| t1800 | NA   | STY1156 | 0.05  | -7.65  | 0.000 | hypothetical protein                                                  | AL513382 |
| t1867 | NA   | STY2013 | 0.25  | -3.20  | 0.018 | putative bacteriophage tail protein                                   | AL513382 |
| t1870 | NA   | STY2016 | 0.31  | -4.16  | 0.005 | putative bacteriophage protein                                        | AL513382 |
| t1884 | NA   | STY2030 | 0.39  | -3.32  | 0.015 | putative bacteriophage protein                                        | AL513382 |
| t1892 | NA   | STY2038 | 0.34  | -3.01  | 0.023 | hypothetical protein                                                  | AL513382 |
| t1912 | NA   | STY1028 | 3.71  | 2.98   | 0.024 | putative bacteriophage protein                                        | AL513382 |
| t1916 | NA   | STY1024 | 0.39  | -3.80  | 0.008 | putative DNA-binding protein                                          | AL513382 |
| t1923 | betA | STY1017 | 0.45  | -2.66  | 0.036 | bacteriophage recombination protein                                   | AL513382 |
| t1924 | exo  | STY1016 | 0.49  | -2.97  | 0.024 | exonuclease                                                           | AL513382 |
| t1926 | NA   | STY1014 | 0.46  | -2.97  | 0.024 | putative DNA methylase                                                | AL513382 |
| t1959 | NA   | STY0975 | 0.40  | -3.00  | 0.023 | hypothetical protein                                                  | AL513382 |
| t2016 | potI | STY0913 | 2.86  | 3.14   | 0.019 | putrescine transporter subunit: membrane component of ABC superfamily | AL513382 |
| t2063 | ybiI | STY0862 | 2.10  | 2.81   | 0.029 | hypothetical protein                                                  | AL513382 |
| t2077 | ybhN | STY0846 | 2.40  | 2.78   | 0.031 | hypothetical protein                                                  | AL513382 |

|       |      |         |      |       |       |                                                                          |          |
|-------|------|---------|------|-------|-------|--------------------------------------------------------------------------|----------|
| t2095 | ybhB | STY0825 | 0.25 | -3.48 | 0.012 | predicted kinase inhibitor                                               | AL513382 |
| t2101 | ybhC | STY0819 | 0.45 | -3.64 | 0.010 | possible pectinesterase precursor                                        | AL513382 |
| t2107 | ybhT | STY0813 | 0.34 | -3.38 | 0.014 | hypothetical protein                                                     | AL513382 |
| t2188 | ybfM | STY0725 | 4.90 | 5.69  | 0.001 | putative outer membrane protein<br>glutamate and aspartate transporter   | AL513382 |
| t2208 | ybeJ | STY0710 | 2.32 | 2.46  | 0.048 | subunit<br>hypothetical zinc-dependant alcohol                           | AL513382 |
| t2252 | ybdR | STY0663 | 2.64 | 4.99  | 0.002 | dehydrogenase                                                            | AL513382 |
| t2267 | NA   | STY0645 | 3.11 | 4.61  | 0.003 | hypothetical protein                                                     | AL513382 |
| t2268 | cstA | STY0644 | 5.09 | 6.14  | 0.001 | carbon starvation protein A                                              | AL513382 |
| t2303 | gtrA | STY0607 | 0.45 | -3.03 | 0.022 | bactoprenol-linked glucose translocase                                   | AL513382 |
| t2336 | glxK | STY0573 | 2.47 | 3.65  | 0.010 | glycerate kinase II                                                      | AL513382 |
| t2350 | sfbA | STY0558 | 4.65 | 6.23  | 0.001 | lipoprotein                                                              | AL513382 |
| t2380 | ybaM | STY0524 | 2.53 | 2.72  | 0.033 | hypothetical protein                                                     | AL513382 |
| t2401 | NA   | STY0501 | 2.71 | 3.97  | 0.007 | putative lyase                                                           | AL513382 |
| t2425 | NA   | STY0477 | 3.49 | 4.29  | 0.005 | hypothetical protein<br>probable membrane component of 2-                | AL513382 |
| t2436 | phnU | STY0466 | 2.93 | 4.40  | 0.004 | aminoethylphosphonate transporter<br>probable membrane component of 2-   | AL513382 |
| t2437 | phnV | STY0465 | 2.43 | 3.56  | 0.011 | aminoethylphosphonate transporter<br>nucleoside-specific channel-forming | AL513382 |
| t2450 | tsx  | STY0451 | 3.73 | 2.77  | 0.031 | protein tsx precursor                                                    | AL513382 |
| t2452 | yajD | STY0449 | 2.11 | 2.79  | 0.030 | hypothetical protein<br>putative DNA-binding transcriptional             | AL513382 |
| t2490 | NA   | STY0406 | 0.47 | -3.75 | 0.009 | regulator                                                                | AL513382 |
| t2508 | NA   | STY0387 | 0.21 | -7.32 | 0.000 | putative metabolite transport protein                                    | AL513382 |
| t2543 | NA   | STY0352 | 0.12 | -6.39 | 0.001 | probable secreted protein                                                | AL513382 |
| t2567 | NA   | STY0323 | 0.46 | -3.36 | 0.014 | hypothetical protein                                                     | AL513382 |
| t2598 | NA   | STY0287 | 2.62 | 2.59  | 0.040 | hypothetical protein<br>glucitol/sorbitol-specific IIBC                  | AL513382 |
| t2734 | srIE | STY2954 | 3.02 | 2.52  | 0.044 | component of PTS system<br>formate hydrogenlyase maturation              | AL513382 |
| t2748 | hycH | STY2968 | 2.21 | 2.45  | 0.049 | protein                                                                  | AL513382 |
| t2749 | hycG | STY2969 | 2.65 | 2.46  | 0.047 | formate hydrogenlyase subunit 7                                          | AL513382 |
| t2809 | NA   | STY3032 | 0.17 | -3.22 | 0.017 | hypothetical protein                                                     | AL513382 |
| t2833 | ygbE | STY3057 | 0.45 | -2.55 | 0.042 | hypothetical protein                                                     | AL513382 |

|       |      |         |      |       |                                              |          |
|-------|------|---------|------|-------|----------------------------------------------|----------|
| t2851 | NA   | STY3078 | 2.51 | 2.89  | 0.026 hypothetical protein                   | AL513382 |
| t2940 | stdA | STY3177 | 0.22 | -2.69 | 0.035 probable fimbrial protein              | AL513382 |
|       |      |         |      |       | possible ABC-transport protein, ATP-         |          |
| t2994 | NA   | STY3233 | 2.60 | 2.44  | 0.049 binding component                      | AL513382 |
| t3014 | NA   | STY3255 | 0.49 | -4.03 | 0.006 hypothetical protein                   | AL513382 |
| t3026 | nupG | STY3268 | 2.42 | 4.27  | 0.005 nucleoside permease                    | AL513382 |
| t3033 | NA   | STY3278 | 0.27 | -2.99 | 0.023 hypothetical protein                   | AL513382 |
| t3074 | NA   | STY3326 | 3.22 | 2.92  | 0.025 hypothetical protein                   | AL513382 |
| t3142 | ygjQ | STY3402 | 2.11 | 2.57  | 0.041 hypothetical protein                   | AL513382 |
| t3147 | NA   | STY3407 | 2.23 | 3.85  | 0.008 hypothetical protein                   | AL513382 |
| t3151 | NA   | STY3411 | 2.03 | 3.75  | 0.009 hypothetical protein                   | AL513382 |
| t3194 | NA   | STY3457 | 0.18 | -4.23 | 0.005 putative protease                      | AL513382 |
| t3219 | NA   | STY3481 | 0.44 | -2.73 | 0.033 hypothetical protein                   | AL513382 |
| t3221 | rplU | STY3483 | 0.36 | -5.02 | 0.002 50S ribosomal protein L21              | AL513382 |
| t3276 | NA   | STY3542 | 0.19 | -3.27 | 0.016 hypothetical protein                   | AL513382 |
|       |      |         |      |       |                                              |          |
| t3342 | NA   | STY3604 | 2.06 | 3.15  | 0.019 chloramphenicol-sensitive protein RarD | AL513382 |
| t3356 | NA   | STY3618 | 0.15 | -2.75 | 0.032 hypothetical protein                   | AL513382 |
| t3404 | cII  | STY3662 | 0.44 | -2.43 | 0.050 regulatory protein cII                 | AL513382 |
| t3408 | NA   | STY3666 | 0.27 | -2.71 | 0.034 hypothetical protein                   | AL513382 |
|       |      |         |      |       | putative ABC transporter permease            |          |
| t3543 | NA   | STY3795 | 3.46 | 2.46  | 0.048 protein                                | AL513382 |
|       |      |         |      |       | putative ABC transporter ATP-binding         |          |
| t3544 | NA   | STY3796 | 7.37 | 3.16  | 0.019 protein                                | AL513382 |
| t3619 | NA   | STY3879 | 3.02 | 2.64  | 0.037 hypothetical protein                   | AL513382 |
|       |      |         |      |       | high affinity ribose transport protein       |          |
| t3638 | rbsD | STY3897 | 0.20 | -4.33 | 0.004 RbsD                                   | AL513382 |
| t3660 | stgB | STY3919 | 0.39 | -3.09 | 0.020 fimbrial chaperone protein             | AL513382 |
| t3691 | NA   | STY3950 | 2.27 | 3.81  | 0.008 hypothetical protein                   | AL513382 |
|       |      |         |      |       | DNA-binding response regulator in two-       |          |
|       |      |         |      |       | component regulatory system with             |          |
| t3728 | uhpA | STY3992 | 2.19 | 2.75  | 0.032 UhpB                                   | AL513382 |
| t3750 | NA   | STY4017 | 2.05 | 2.62  | 0.038 putative transferase                   | AL513382 |
| t3757 | slsA | STY4025 | 0.08 | -8.42 | 0.000 hypothetical protein                   | AL513382 |
| t3806 | waaL | STY4082 | 0.46 | -2.57 | 0.041 O-antigen ligase                       | AL513382 |
| t3841 | NA   | STY4118 | 2.72 | 3.26  | 0.016 putative transcriptional regulator     | AL513382 |
|       |      |         |      |       | periplasmic dipeptide transport protein      |          |
| t3885 | dppA | STY4168 | 2.25 | 3.86  | 0.008 precursor                              | AL513382 |

|       |      |         |      |        |                                                                                |          |
|-------|------|---------|------|--------|--------------------------------------------------------------------------------|----------|
| t3912 | NA   | STY4198 | 0.28 | -3.79  | 0.008 phage-like lysozyme                                                      | AL513382 |
| t3973 | NA   | STY4263 | 0.29 | -2.53  | 0.043 hypothetical protein                                                     | AL513382 |
| t4017 | yrfA | STY4307 | 5.76 | 4.13   | 0.006 hypothetical protein                                                     | AL513382 |
| t4033 | ppiA | STY4324 | 0.35 | -3.42  | peptidyl-prolyl cis-trans isomerase A (rotamase A)                             | AL513382 |
| t4100 | smg  | STY4393 | 2.48 | 4.39   | 0.004 hypothetical protein                                                     | AL513382 |
| t4128 | NA   | STY4418 | 0.47 | -3.51  | 0.012 hypothetical protein                                                     | AL513382 |
| t4180 | NA   | STY4472 | 2.95 | 4.02   | 0.006 hypothetical protein                                                     | AL513382 |
| t4200 | NA   | STY4492 | 0.45 | -3.42  | 0.013 predicted metal dependent hydrolase                                      | AL513382 |
| t4201 | NA   | STY4493 | 2.41 | 2.76   | 0.031 arginine:agmatin antiporter                                              | AL513382 |
| t4267 | NA   | STY4571 | 0.44 | -2.72  | 0.033 putative lipoprotein                                                     | AL513382 |
| t4271 | NA   | STY4574 | 2.20 | 3.45   | 0.013 hypothetical protein                                                     | AL513382 |
| t4275 | NA   | STY4578 | 2.14 | 2.63   | 0.038 hypothetical protein                                                     | AL513382 |
| t4289 | NA   | STY4595 | 2.29 | 4.24   | 0.005 hypothetical protein                                                     | AL513382 |
| t4298 | NA   | STY4604 | 0.23 | -4.30  | 0.005 hypothetical protein                                                     | AL513382 |
| t4308 | NA   | STY4614 | 2.39 | 3.00   | 0.023 phage baseplate assembly protein                                         | AL513382 |
| t4326 | NA   | STY4632 | 4.23 | 2.43   | 0.049 hypothetical protein                                                     | AL513382 |
| t4344 | vexE | STY4651 | 0.02 | -14.96 | 0.000 Vi polysaccharide export protein                                         | AL513382 |
| t4345 | vexD | STY4652 | 0.02 | -11.28 | Vi polysaccharide export inner-membrane protein                                | AL513382 |
| t4346 | vexC | STY4653 | 0.01 | -9.52  | 0.000 Vi polysaccharide export ATP-binding protein                             | AL513382 |
| t4348 | vexA | STY4655 | 0.02 | -14.28 | 0.000 Vi polysaccharide export protein                                         | AL513382 |
| t4349 | tvIE | STY4656 | 0.02 | -14.07 | Vi polysaccharide biosynthesis protein                                         | AL513382 |
| t4350 | tvID | STY4659 | 0.01 | -16.64 | 0.000 TviE                                                                     | AL513382 |
| t4351 | tvIC | STY4660 | 0.00 | -14.41 | 0.000 Vi polysaccharide biosynthesis protein, epimerase                        | AL513382 |
| t4352 | tvIB | STY4661 | 0.00 | -13.21 | Vi polysaccharide biosynthesis protein, UDP- glucose/GDP-mannose dehydrogenase | AL513382 |
| t4353 | tvIA | STY4662 | 0.00 | -8.72  | 0.000 Vi polysaccharide biosynthesis protein                                   | AL513382 |
| t4354 | NA   | STY4663 | 0.20 | -2.99  | 0.023 hypothetical protein                                                     | AL513382 |
| t4357 | NA   | STY4666 | 0.44 | -3.79  | 0.008 probable phage integrase                                                 | AL513382 |
| t4397 | yjeM | STY4705 | 0.21 | -5.04  | 0.002 putative amino acid permease                                             | AL513382 |

|       |      |         |      |       |       |                                          |          |
|-------|------|---------|------|-------|-------|------------------------------------------|----------|
| t4398 | yjeN | STY4706 | 0.26 | -2.43 | 0.050 | hypothetical protein                     | AL513382 |
| t4466 | NA   | STY4771 | 2.05 | 2.71  | 0.034 | putative sugar transporter               | AL513382 |
| t4475 | NA   | STY4780 | 3.69 | 4.63  | 0.003 | hypothetical protein                     | AL513382 |
| t4526 | cI   | STY4829 | 0.48 | -2.90 | 0.026 | phage immunity repressor protein         | AL513382 |
|       |      |         |      |       |       | ferric iron reductase involved in ferric |          |
| t4593 | NA   | STY4903 | 2.20 | 2.46  | 0.048 | hydroxamate transport                    | AL513382 |
| t4604 | osmY | STY4911 | 0.35 | -3.24 | 0.017 | periplasmic protein                      | AL513382 |
