# Supplementary material
Source: publisher figshare collection journal article supplement (https://plos.figshare.com/articles/dataset/_/147009)

User algorithm from 1104\_s\_2.plot Window size: 50

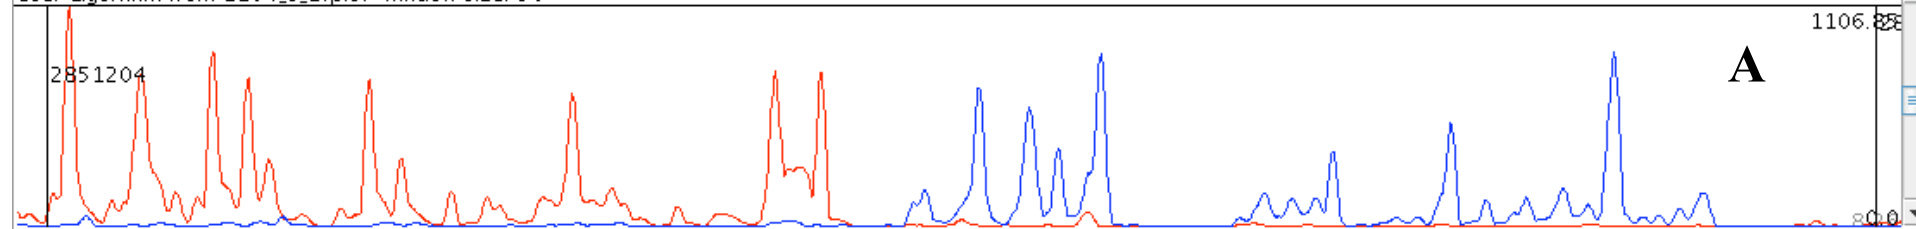

User algorithm from 876\_s\_3.plot Window size: 50

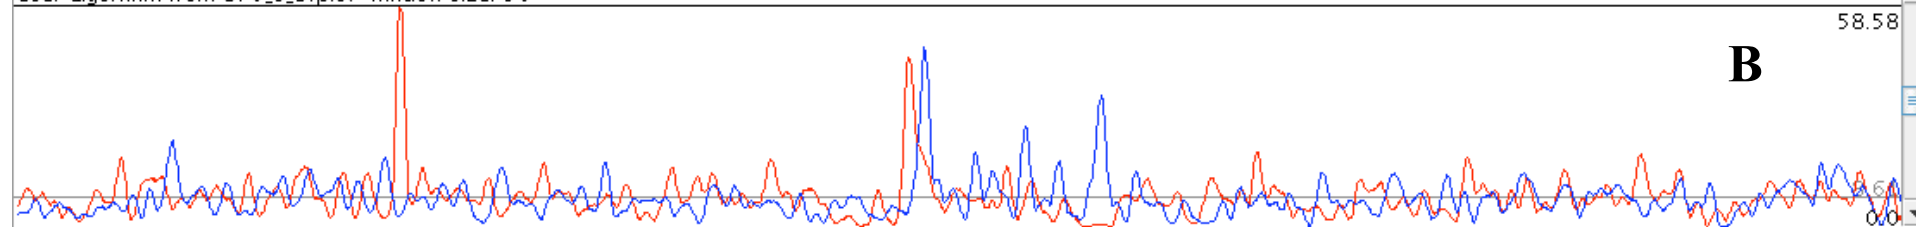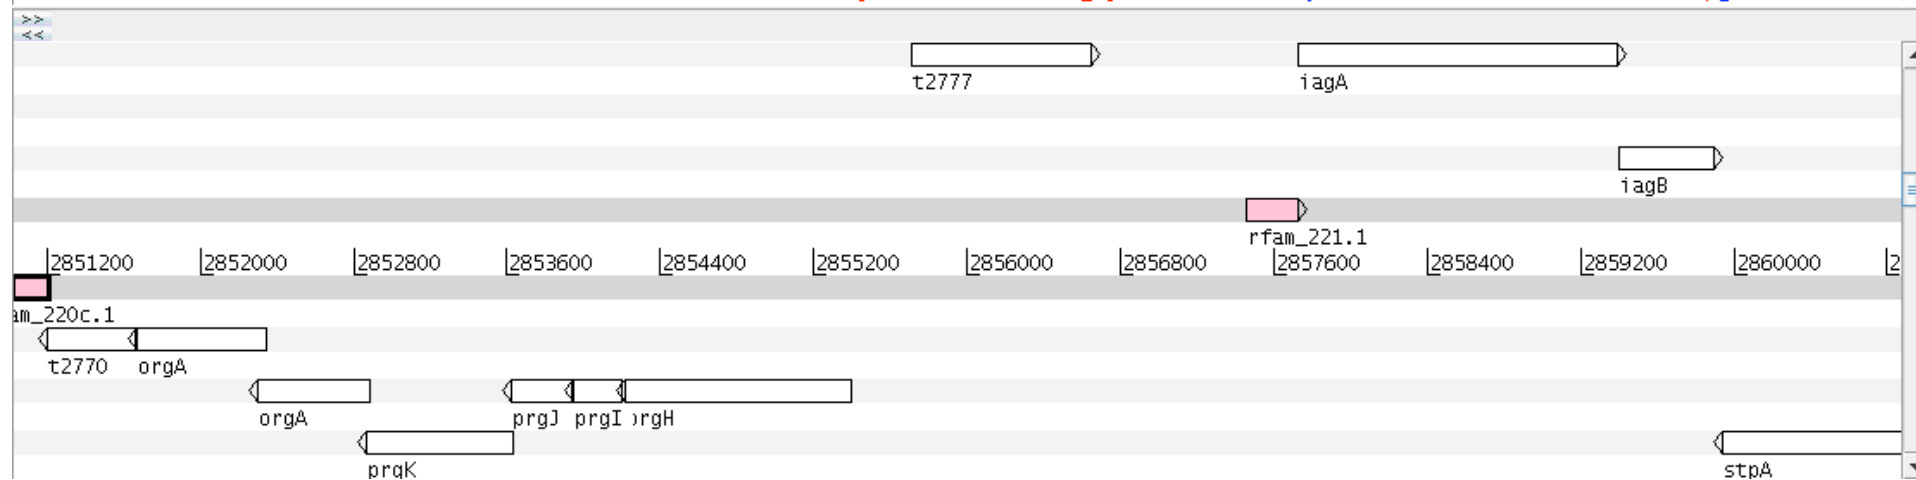

Supplement: Supplementary file [file 1]
